# Supplementary figures and images for: Defining the healthy "core microbiome" of oral microbial communities
Source: Springer Nature journal article supplement (doi:10.1186/1471-2180-9-259), 2009-01-01

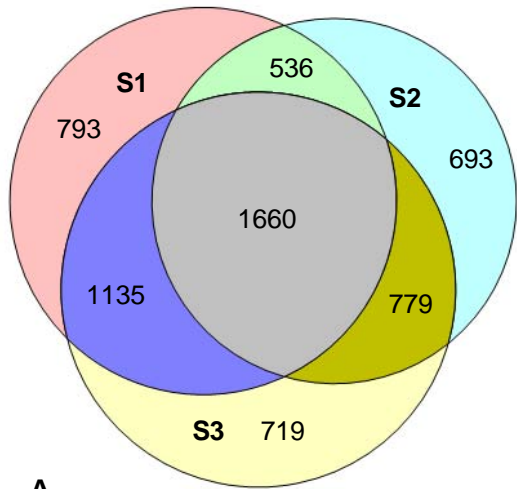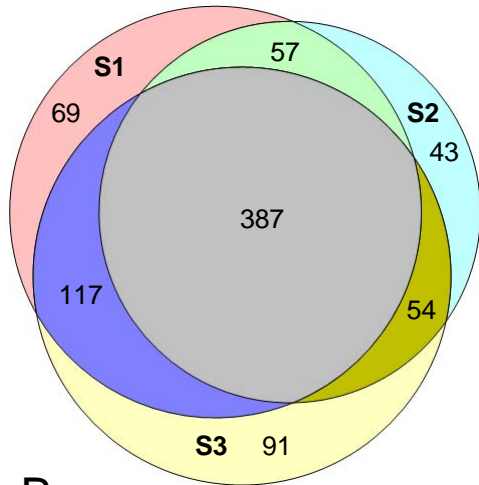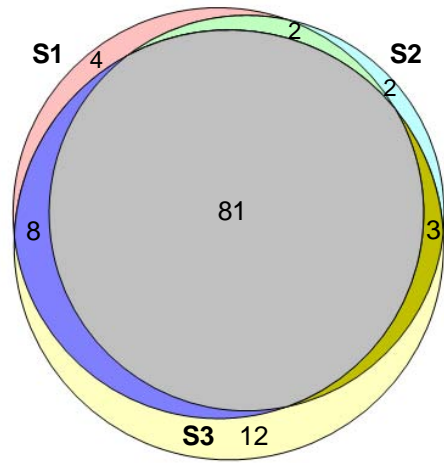

Supplement: 12866_2009_930_MOESM10_ESM.pdf [file 12866_2009_930_MOESM10_ESM.pdf]

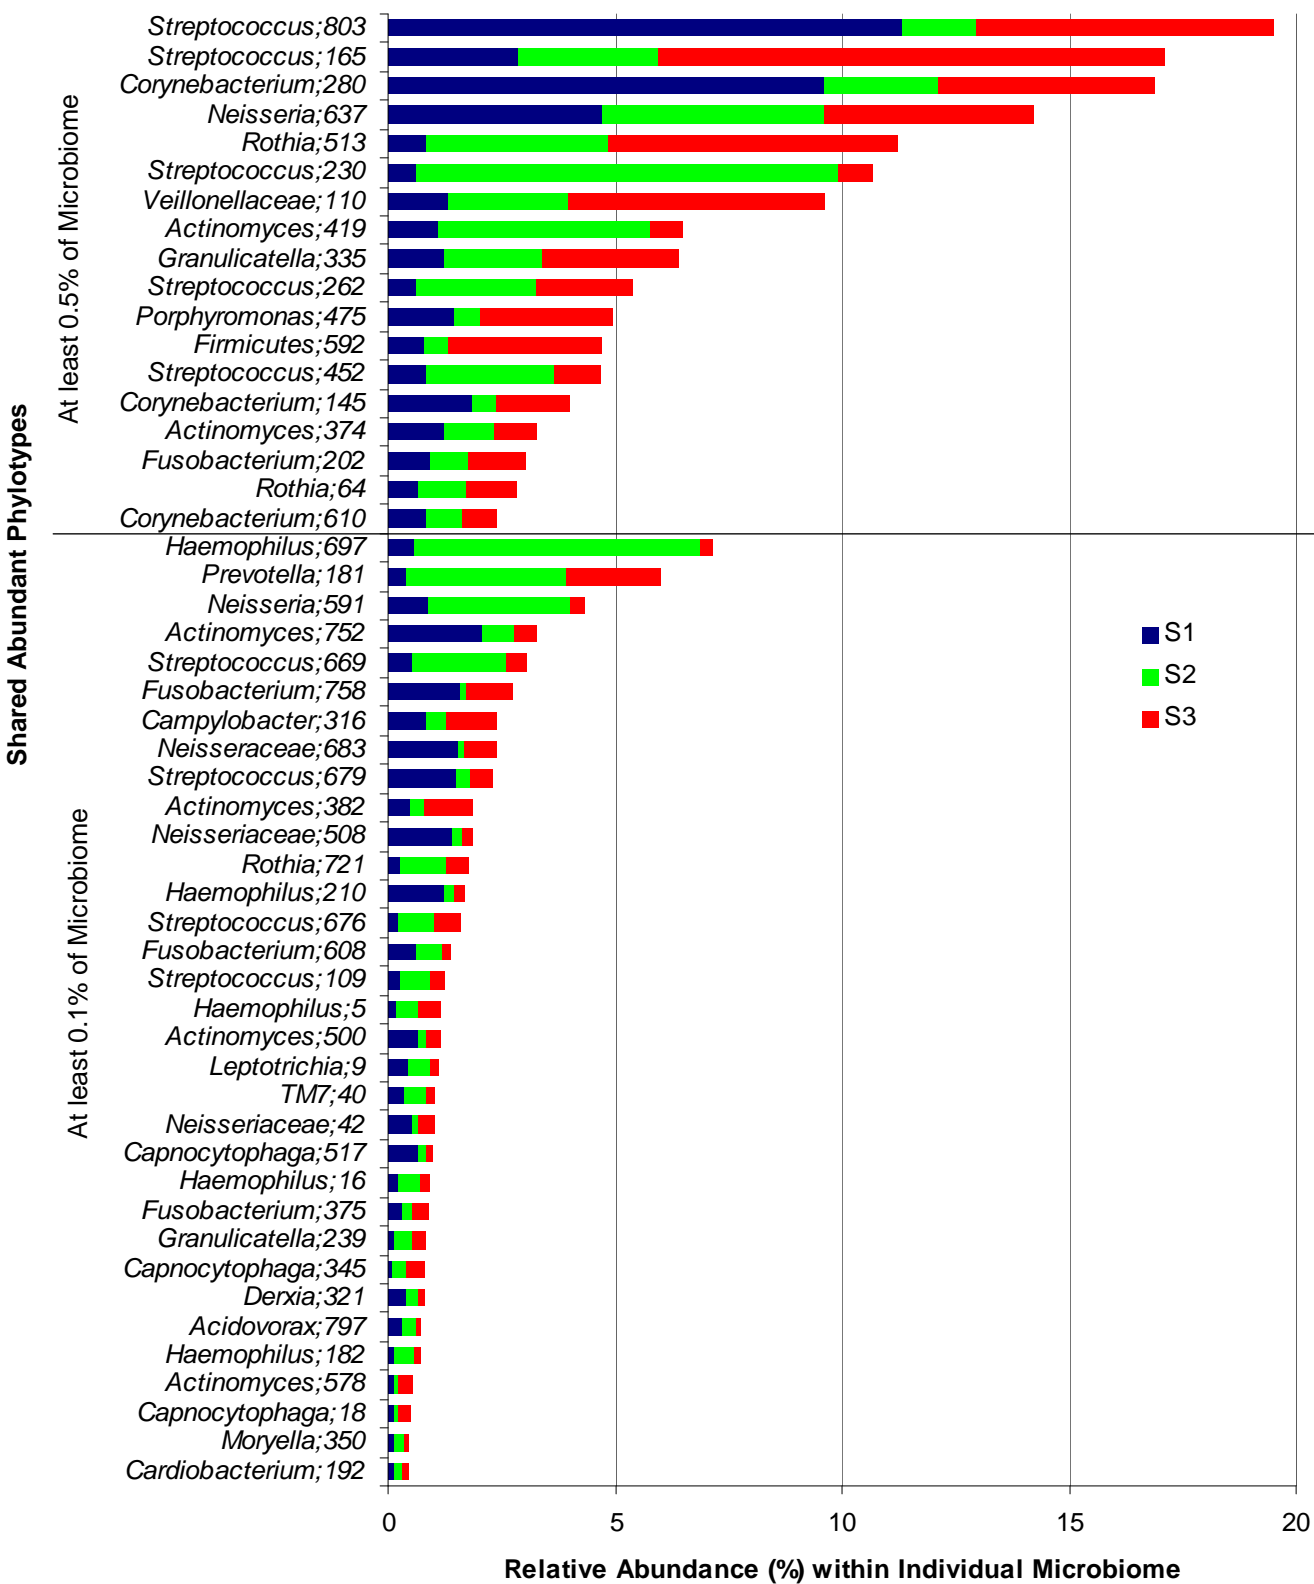

Supplement: 12866_2009_930_MOESM11_ESM.pdf [file 12866_2009_930_MOESM11_ESM.pdf]

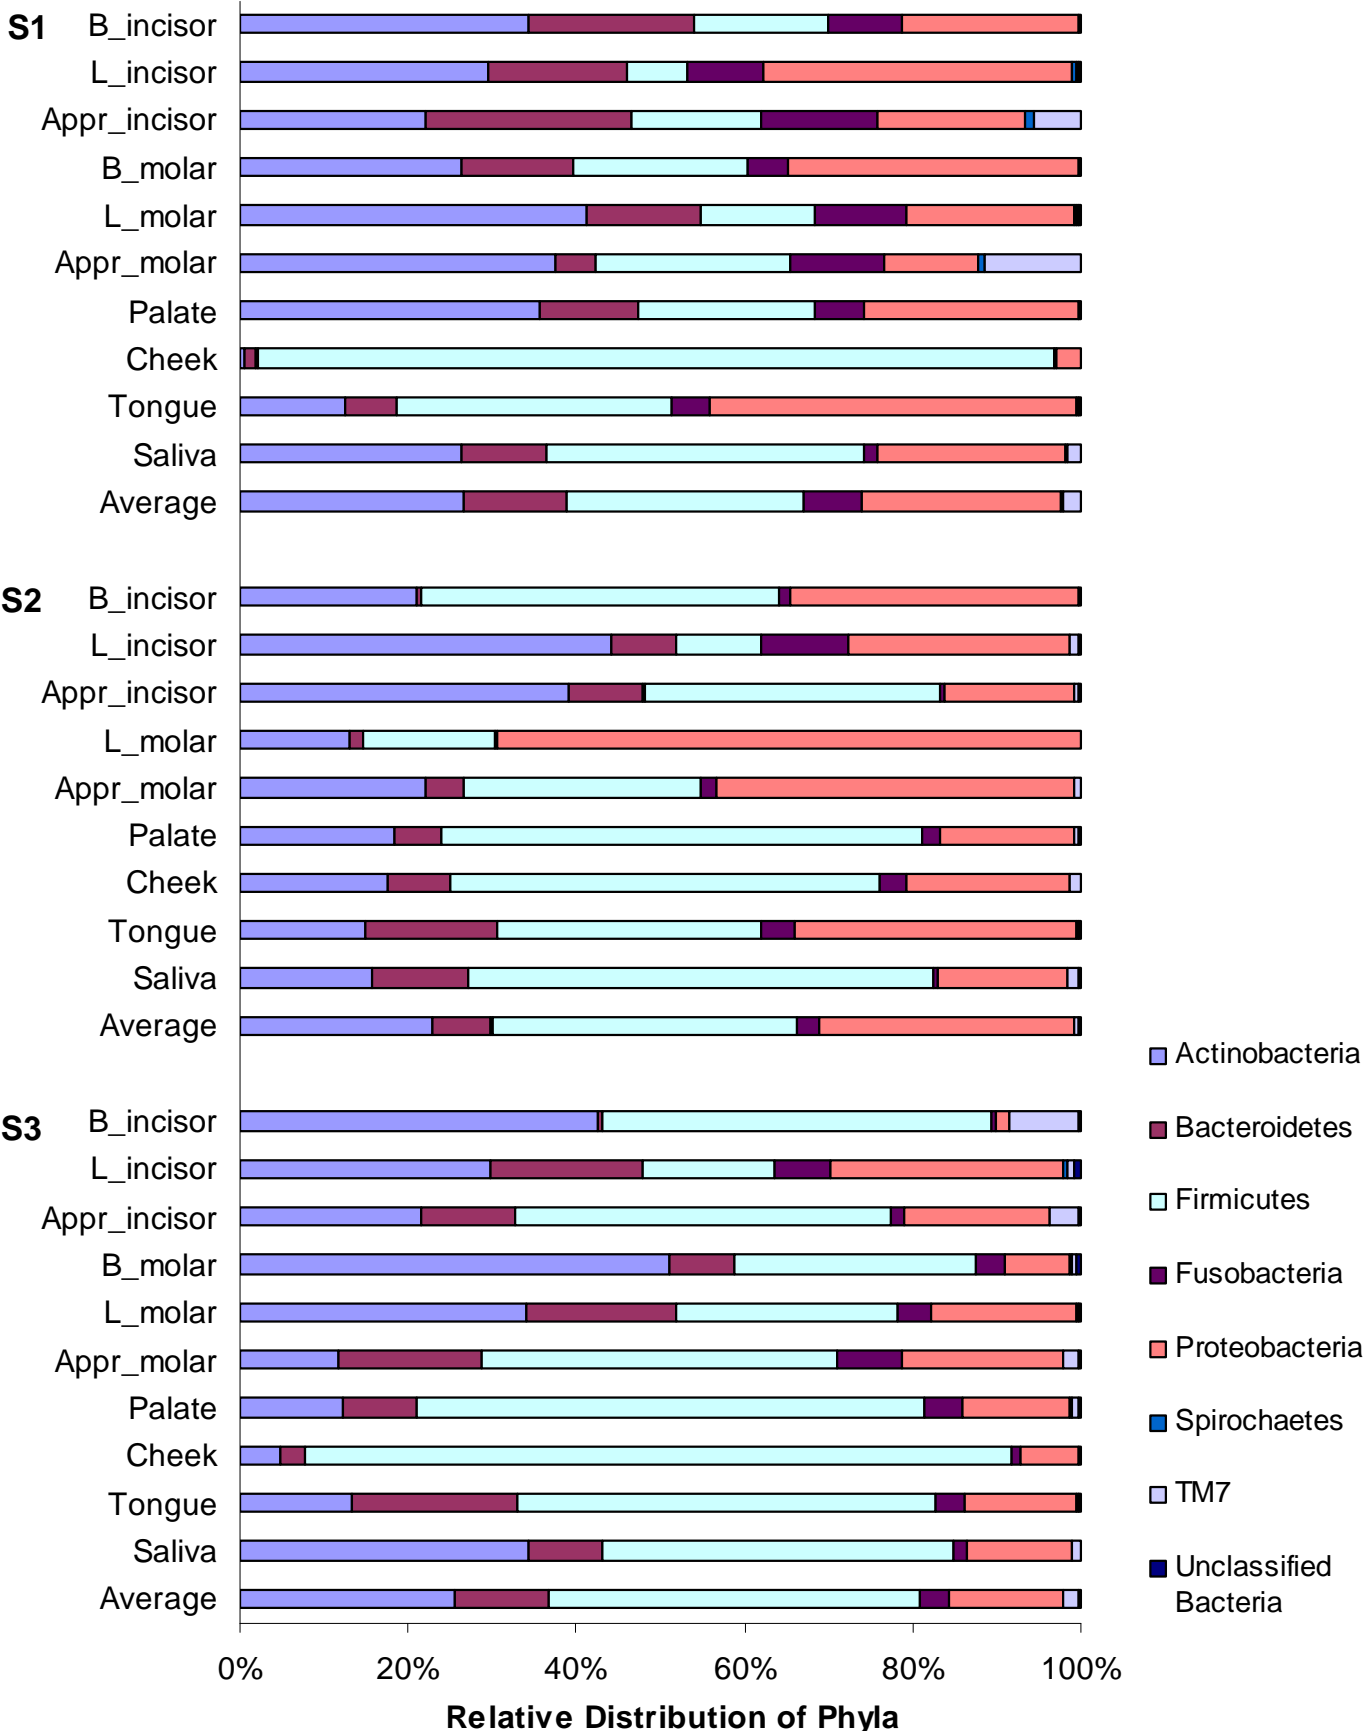

Supplement: 12866_2009_930_MOESM12_ESM.pdf [file 12866_2009_930_MOESM12_ESM.pdf]

A

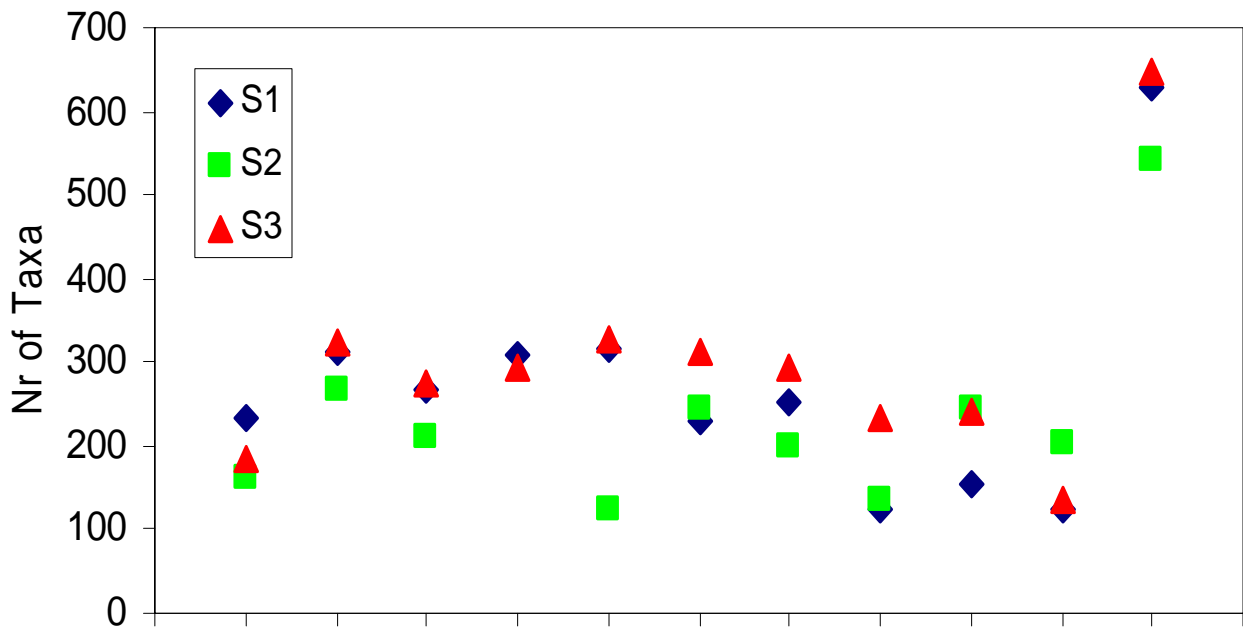

B

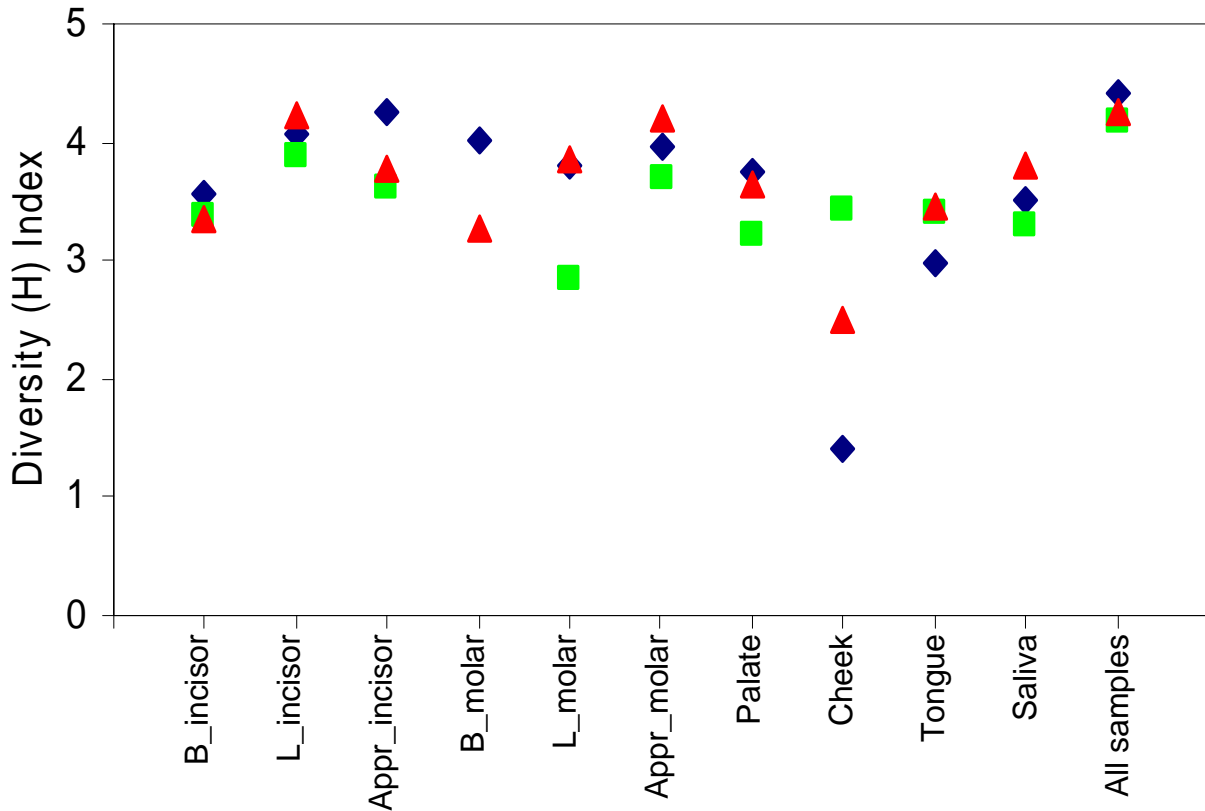

Supplement: 12866_2009_930_MOESM13_ESM.pdf [file 12866_2009_930_MOESM13_ESM.pdf]

A

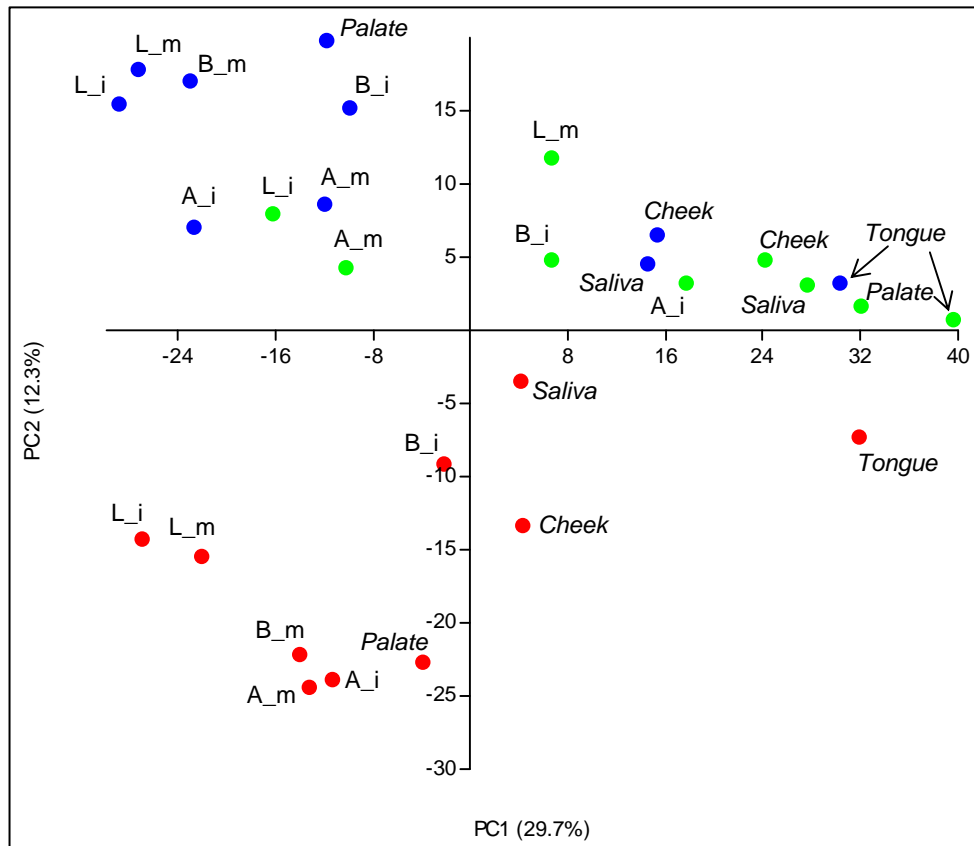

B

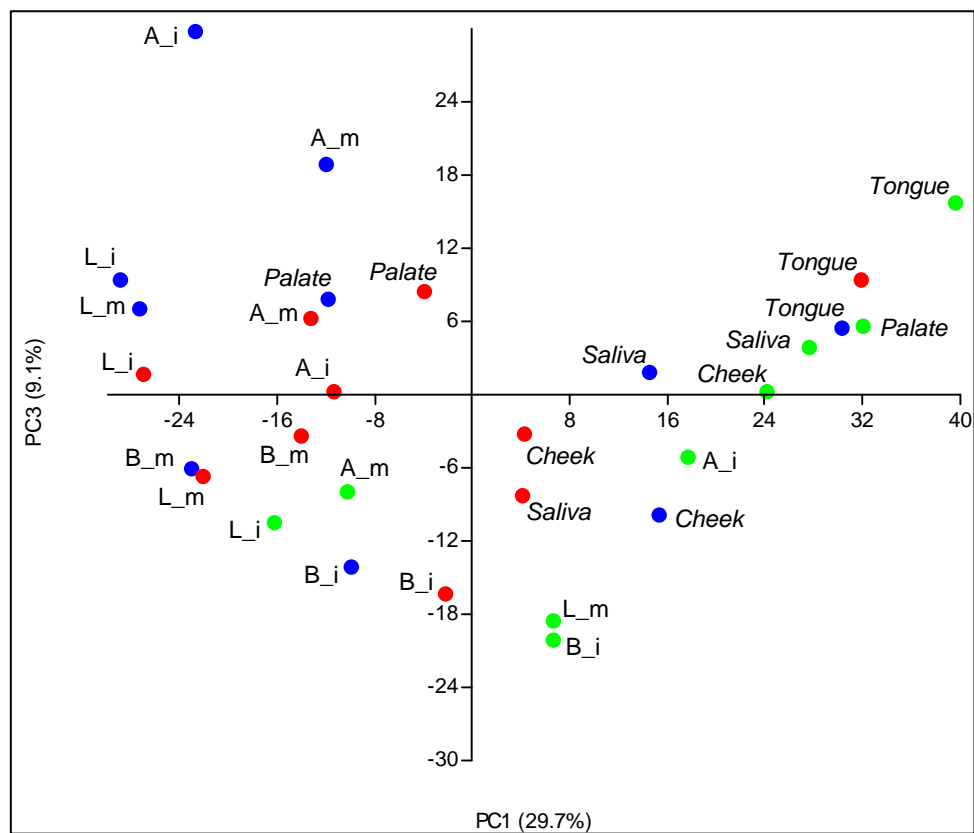

Supplement: 12866_2009_930_MOESM14_ESM.pdf [file 12866_2009_930_MOESM14_ESM.pdf]

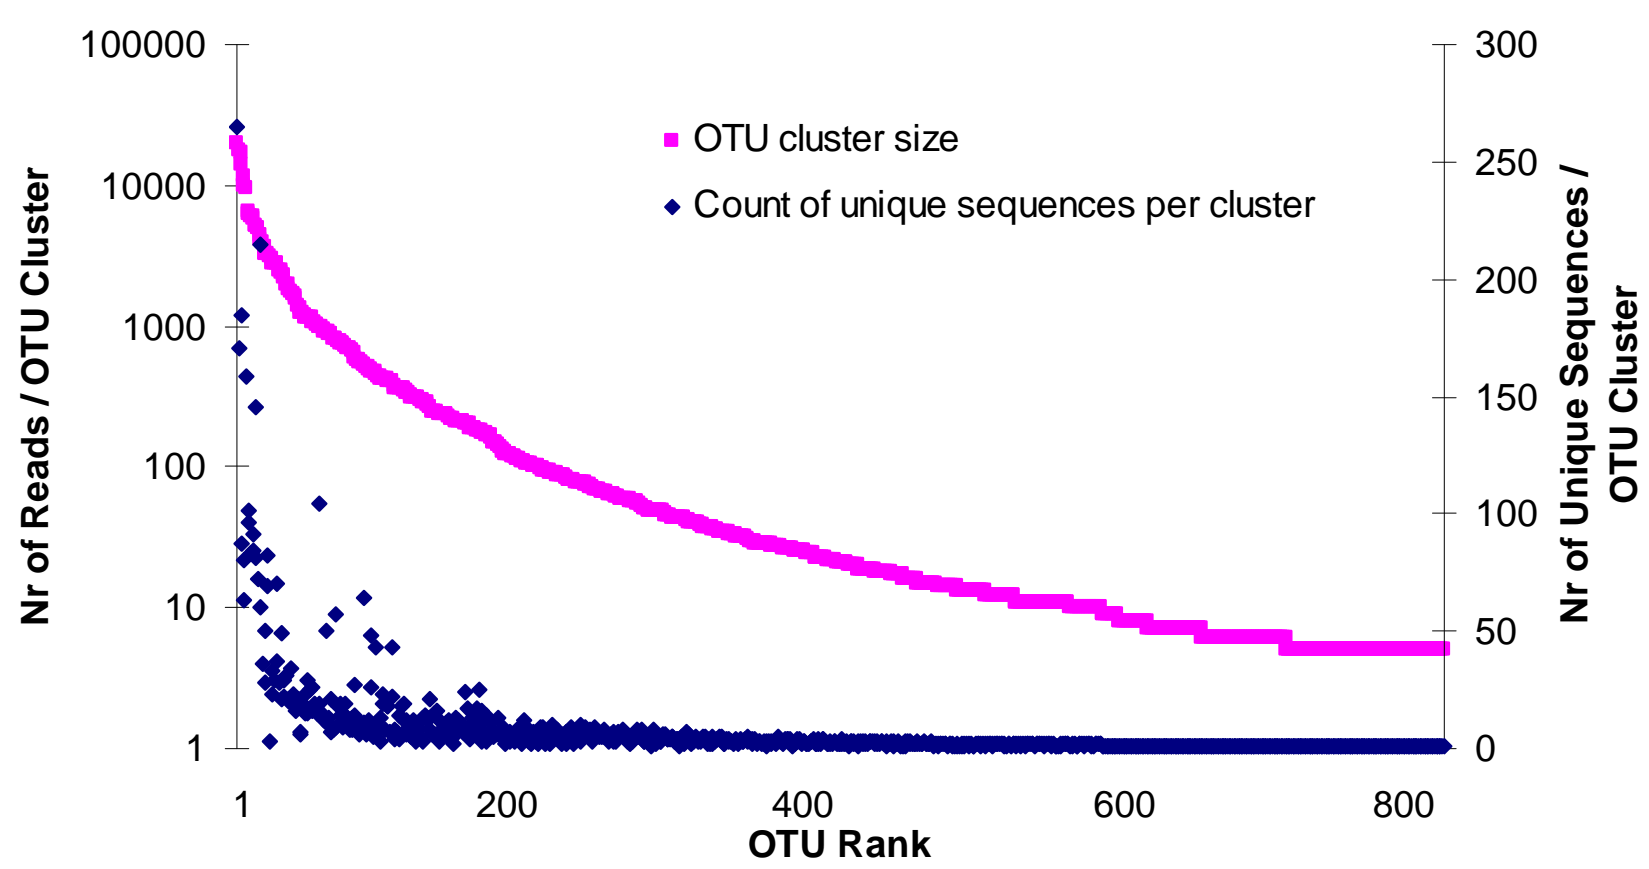

Supplement: 12866_2009_930_MOESM8_ESM.pdf [file 12866_2009_930_MOESM8_ESM.pdf]

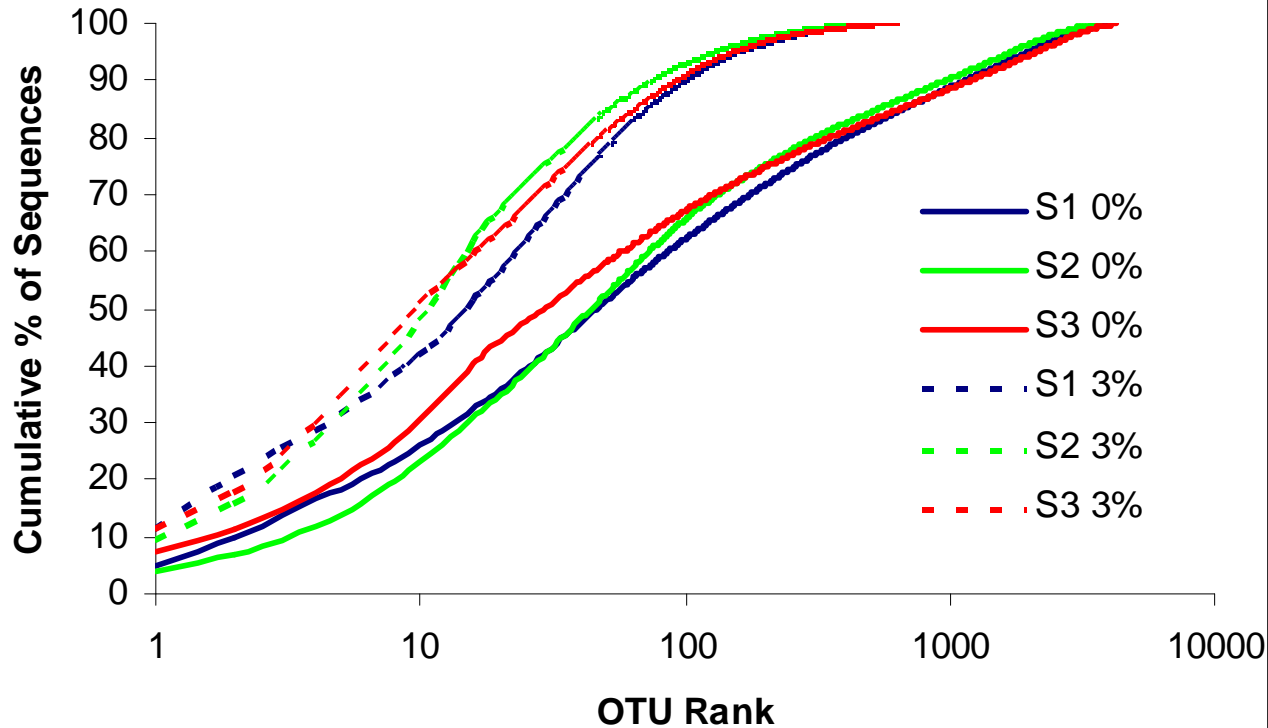

Supplement: 12866_2009_930_MOESM9_ESM.pdf [file 12866_2009_930_MOESM9_ESM.pdf]
